# Supplementary material for: Factors That Influence the Use of Dietary Supplements among the Students of Wroclaw Medical University in Poland during the COVID-19 Pandemic
Source: MDPI journal article supplement (doi:10.3390/ijerph19127485), 2022-06-18
Supplement: s1 [file s1]

**Table S1: Mean values of the year of the studies, stress, and knowledge levels in subgroups of students.**  
**Analyses were performed using U-Mann Whitney or Kruskal-Wallis tests (for two or more groups, respectively) with Dunn's *post-hoc* test and Bonferroni correction.**

|                                                              |                                 | Year of studies<br>mean $\pm$ SD | p-value                                                                     | Stress level mean<br>$\pm$ SD | p-value                                                                                                              | Level of<br>knowledge<br>mean $\pm$ SD | p-value                                                                                                                                                                                                                                                                                      |
|--------------------------------------------------------------|---------------------------------|----------------------------------|-----------------------------------------------------------------------------|-------------------------------|----------------------------------------------------------------------------------------------------------------------|----------------------------------------|----------------------------------------------------------------------------------------------------------------------------------------------------------------------------------------------------------------------------------------------------------------------------------------------|
| Division                                                     | Polish                          | 3.30 $\pm$ 1.26                  | <b>p = 0.0000</b>                                                           | 7.21 $\pm$ 2.07               | p = 0.6308                                                                                                           | 6.00 $\pm$ 2.02                        | <b>p = 0.0002</b>                                                                                                                                                                                                                                                                            |
|                                                              | English                         | 3.73 $\pm$ 1.24                  |                                                                             | 7.35 $\pm$ 1.87               |                                                                                                                      | 5.33 $\pm$ 2.16                        |                                                                                                                                                                                                                                                                                              |
| Gender                                                       | Women                           | 3.38 $\pm$ 1.29                  | <b>p = 0.0279</b>                                                           | 7.43 $\pm$ 1.89               | <b>p = 0.0007</b>                                                                                                    | 5.83 $\pm$ 2.06                        | p = 0.9616                                                                                                                                                                                                                                                                                   |
|                                                              | Men                             | 3.60 $\pm$ 1.21                  |                                                                             | 6.70 $\pm$ 2.27               |                                                                                                                      | 5.78 $\pm$ 2.12                        |                                                                                                                                                                                                                                                                                              |
| Faculty                                                      | Medical (M)                     | 3.53 $\pm$ 1.21                  | <b>p = 0.0000</b><br>HS <i>vs.</i> M<br>HS <i>vs.</i> Ph<br>HS <i>vs.</i> D | 6.99 $\pm$ 2.04               | <b>p = 0.006</b><br>Ph <i>vs.</i> M                                                                                  | 5.44 $\pm$ 2.11                        | <b>p = 0.0000</b><br>Ph <i>vs.</i> M<br><b>p = 0.0127</b><br>Ph <i>vs.</i> HS                                                                                                                                                                                                                |
|                                                              | Pharmacy (Ph)                   | 3.48 $\pm$ 1.42                  |                                                                             | 7.61 $\pm$ 1.82               |                                                                                                                      | 6.47 $\pm$ 2.0                         |                                                                                                                                                                                                                                                                                              |
|                                                              | Dentistry (D)                   | 3.72 $\pm$ 0.93                  |                                                                             | 7.42 $\pm$ 2.27               |                                                                                                                      | 5.83 $\pm$ 1.93                        |                                                                                                                                                                                                                                                                                              |
|                                                              | Health Science (HS)             | 2.53 $\pm$ 0.94                  |                                                                             | 7.32 $\pm$ 1.93               |                                                                                                                      | 5.55 $\pm$ 1.88                        |                                                                                                                                                                                                                                                                                              |
| Year of studies                                              | 2 <sup>nd</sup>                 | -----                            | -----                                                                       | 7.52 $\pm$ 1.83               | <b>p = 0.0426</b><br>6 <sup>th</sup> <i>vs.</i> 2 <sup>nd</sup>                                                      | 5.32 $\pm$ 2.0                         | <b>p = 0.0015</b><br>5 <sup>th</sup> <i>vs.</i> 2 <sup>nd</sup><br><b>p = 0.0095</b><br>5 <sup>th</sup> <i>vs.</i> 3 <sup>rd</sup><br><b>p = 0.0000</b><br>6 <sup>th</sup> <i>vs.</i> 2 <sup>nd</sup> and 3 <sup>rd</sup><br><b>p = 0.0447</b><br>6 <sup>th</sup> <i>vs.</i> 4 <sup>th</sup> |
|                                                              | 3 <sup>rd</sup>                 | -----                            |                                                                             | 7.07 $\pm$ 2.09               |                                                                                                                      | 5.51 $\pm$ 2.20                        |                                                                                                                                                                                                                                                                                              |
|                                                              | 4 <sup>th</sup>                 | -----                            |                                                                             | 7.53 $\pm$ 1.68               |                                                                                                                      | 5.97 $\pm$ 1.79                        |                                                                                                                                                                                                                                                                                              |
|                                                              | 5 <sup>th</sup>                 | -----                            |                                                                             | 7.36 $\pm$ 2.30               |                                                                                                                      | 6.57 $\pm$ 1.88                        |                                                                                                                                                                                                                                                                                              |
|                                                              | 6 <sup>th</sup>                 | -----                            |                                                                             | 6.58 $\pm$ 2.27               |                                                                                                                      | 6.88 $\pm$ 2.01                        |                                                                                                                                                                                                                                                                                              |
| Year of studies                                              | pre-clinical                    | -----                            | -----                                                                       | 7.33 $\pm$ 1.93               | p = 0.2567                                                                                                           | 5.56 $\pm$ 2.06                        | <b>p = 0.0000</b>                                                                                                                                                                                                                                                                            |
|                                                              | clinical                        | -----                            |                                                                             | 6.95 $\pm$ 2.31               |                                                                                                                      | 6.73 $\pm$ 1.95                        |                                                                                                                                                                                                                                                                                              |
| Diet                                                         | healthy diet                    | 3.55 $\pm$ 1.30                  | <b>p = 0.0143</b>                                                           | 6.91 $\pm$ 2.0                | <b>p = 0.0000</b>                                                                                                    | 6.02 $\pm$ 2.04                        | <b>p = 0.0018</b>                                                                                                                                                                                                                                                                            |
|                                                              | unhealthy diet/difficult to say | 3.29 $\pm$ 1.22                  |                                                                             | 7.66 $\pm$ 1.95               |                                                                                                                      | 5.53 $\pm$ 2.12                        |                                                                                                                                                                                                                                                                                              |
| The self-estimated stress level<br>(0-10 pts scale)          | high, > 6 pts (H)               | 3.39 $\pm$ 1.25                  | p = NS in all<br>comparisons                                                | -----                         | -----                                                                                                                | 6.02 $\pm$ 2.03                        | <b>p = 0.0001</b><br>H <i>vs.</i> M                                                                                                                                                                                                                                                          |
|                                                              | moderate, 4-6 pts (M)           | 3.47 $\pm$ 1.28                  |                                                                             | -----                         |                                                                                                                      | 5.13 $\pm$ 2.07                        |                                                                                                                                                                                                                                                                                              |
|                                                              | low, < 4 pts (L)                | 2.86 $\pm$ 1.40                  |                                                                             | -----                         |                                                                                                                      | 5.50 $\pm$ 2.31                        |                                                                                                                                                                                                                                                                                              |
| The self-estimated knowledge about<br>DS<br>(0-10 pts scale) | high, > 6 pts (H)               | 3.75 $\pm$ 1.37                  | <b>p = 0.0002</b><br>H <i>vs.</i> L                                         | 7.56 $\pm$ 1.88               | <b>p = 0.0000</b><br>H <i>vs.</i> L<br><b>p = 0.0028</b><br>H <i>vs.</i> M                                           | -----                                  | -----                                                                                                                                                                                                                                                                                        |
|                                                              | moderate, 4-6 pts (M)           | 3.28 $\pm$ 1.19                  |                                                                             | 7.25 $\pm$ 1.98               |                                                                                                                      | -----                                  |                                                                                                                                                                                                                                                                                              |
|                                                              | low, < 4 pts (L)                | 3.75 $\pm$ 1.37                  |                                                                             | 6.50 $\pm$ 2.21               |                                                                                                                      | -----                                  |                                                                                                                                                                                                                                                                                              |
| DS for stress/anxiety/<br>depression/sleeplessness           | users                           | 3.54 $\pm$ 1.28                  | p = 0.1428                                                                  | 7.89 $\pm$ 1.80               | <b>p = 0.0000</b>                                                                                                    | 6.61 $\pm$ 1.92                        | <b>p = 0.0000</b>                                                                                                                                                                                                                                                                            |
|                                                              | non-users                       | 3.38 $\pm$ 1.26                  |                                                                             | 6.93 $\pm$ 2.08               |                                                                                                                      | 5.39 $\pm$ 2.05                        |                                                                                                                                                                                                                                                                                              |
| Other DS                                                     | users                           | 3.55 $\pm$ 1.32                  | <b>p = 0.0137</b>                                                           | 7.32 $\pm$ 1.87               | p = 0.6691                                                                                                           | 6.18 $\pm$ 1.88                        | <b>p = 0.0000</b>                                                                                                                                                                                                                                                                            |
|                                                              | non-users                       | 3.26 $\pm$ 1.17                  |                                                                             | 7.15 $\pm$ 2.21               |                                                                                                                      | 5.23 $\pm$ 2.24                        |                                                                                                                                                                                                                                                                                              |
| Any dietary supplement                                       | users                           | 3.53 $\pm$ 1.30                  | <b>p = 0.01</b>                                                             | 7.42 $\pm$ 1.87               | <b>p = 0.0083</b>                                                                                                    | 6.24 $\pm$ 1.88                        | <b>p = 0.0000</b>                                                                                                                                                                                                                                                                            |
|                                                              | non-users                       | 3.21 $\pm$ 1.16                  |                                                                             | 6.86 $\pm$ 2.27               |                                                                                                                      | 4.77 $\pm$ 2.19                        |                                                                                                                                                                                                                                                                                              |
| POM                                                          | no, never (N)                   | 3.41 $\pm$ 1.26                  | NS in all<br>comparisons                                                    | 7.03 $\pm$ 1.99               | <b>p = 0.0002</b><br>YS <i>vs.</i> N<br><b>p = 0.0132</b><br>YR <i>vs.</i> N<br><b>p = 0.0002</b><br>PD <i>vs.</i> N | 5.65 $\pm$ 2.10                        | <b>p = 0.0016</b><br>YR <i>vs.</i> N                                                                                                                                                                                                                                                         |
|                                                              | yes, sometimes (YS)             | 3.61 $\pm$ 1.68                  |                                                                             | 7.82 $\pm$ 2.25               |                                                                                                                      | 6.39 $\pm$ 1.53                        |                                                                                                                                                                                                                                                                                              |
|                                                              | yes, regularly (YR)             | 3.67 $\pm$ 1.33                  |                                                                             | 8.24 $\pm$ 1.61               |                                                                                                                      | 6.65 $\pm$ 2.12                        |                                                                                                                                                                                                                                                                                              |
|                                                              | prefer not to disclose (PD)     | 3.0 $\pm$ 1.15                   |                                                                             | 8.84 $\pm$ 1.21               |                                                                                                                      | 5.74 $\pm$ 2.10                        |                                                                                                                                                                                                                                                                                              |
